# Supplementary material for: Influence of Housing and Management on Claw Health in Swiss Dairy Goats
Source: MDPI journal article supplement (doi:10.3390/ani11071873), 2021-06-23
Supplement: s1 [file s1]

| <i>Farm ID</i> | <i>Herd size</i> | <i>Breed</i>       | <i>Horn status</i> | <i>Straw yard</i> | <i>Additio<br/>nal<br/>area<br/>with<br/>hard<br/>floor</i> | <i>Excercise<br/>yard</i> | <i>Past<br/>ure</i> | <i>Grazing<br/>in<br/>alpine<br/>regions</i> | <i>Frequency<br/>of routine<br/>trimming/<br/>year</i> | <i>Age of<br/>first<br/>trimmin<br/>g/<br/>months</i> | <i>Who conducts<br/>the trimming<br/>(first /second<br/>trimming)</i> | <i>Special<br/>skills<br/>training<br/>(first<br/>/second<br/>trimmin<br/>g)</i> | <i>Applicatio<br/>n of<br/>footbaths</i> | <i>Equipment<br/>used<br/>(first/secon<br/>d<br/>trimming)</i> | <i>Disinfectin<br/>g of<br/>bleeding<br/>lesions<br/>(first/secon<br/>d<br/>trimming)</i> |
|----------------|------------------|--------------------|--------------------|-------------------|-------------------------------------------------------------|---------------------------|---------------------|----------------------------------------------|--------------------------------------------------------|-------------------------------------------------------|-----------------------------------------------------------------------|----------------------------------------------------------------------------------|------------------------------------------|----------------------------------------------------------------|-------------------------------------------------------------------------------------------|
| 1              | 50               | Mixed              | Mixed              | +                 | +                                                           | +                         | +                   | -                                            | 2-3                                                    | 5                                                     | Farmer                                                                | -                                                                                | -                                        | FS                                                             | -                                                                                         |
| 2              | 85               | Mixed              | Mixed              | +                 | +                                                           | +                         | +                   | -                                            | 5-6                                                    | 5-6                                                   | Employee                                                              | -                                                                                | -                                        | PS, PK                                                         | -                                                                                         |
| 3              | 30               | Chamois<br>Colored | Hornless           | +                 | +                                                           | +                         | +                   | -                                            | 3-4                                                    | 5-6                                                   | Employee                                                              | +                                                                                | -                                        | FS                                                             | -                                                                                         |
| 4              | 80               | Mixed              | Mixed              | +                 | +                                                           | +                         | +                   | -                                            | 2                                                      | 12                                                    | Farmer                                                                | -                                                                                | -                                        | PS                                                             | +/-                                                                                       |
| 5              | 36               | Mixed              | Hornless           | +                 | +                                                           | +                         | +                   | -                                            | NA                                                     | 4.5-6                                                 | Farmer                                                                | +                                                                                | -                                        | FS                                                             | -                                                                                         |
| 6              | 60               | Chamois<br>Colored | Hornless           | -                 | +                                                           | +                         | +                   | +                                            | 4-5                                                    | 5                                                     | Farmer                                                                | -                                                                                | -                                        | PK                                                             | +/-                                                                                       |
| 7              | 100              | Saanen             | Mixed              | +                 | +                                                           | +                         | +                   | -                                            | 3                                                      | 6                                                     | Farmer/Employ<br>ee                                                   | +/-                                                                              | -                                        | PS                                                             | -                                                                                         |
| 8              | 30               | Mixed              | Hornless           | -                 | +                                                           | -                         |                     | -                                            | 5-6                                                    | 6                                                     | Farmer                                                                | -                                                                                | -                                        | PS, HK                                                         | -                                                                                         |
| 9              | 30               | Mixed              | Mixed              | +                 | +                                                           | +                         | +                   | -                                            | 5-6                                                    | 3                                                     | Farmer                                                                | -                                                                                | -                                        | FS                                                             | -                                                                                         |
| 10             | 70               | Mixed              | Mixed              | +                 | +                                                           | +                         | +                   | +                                            | 2                                                      | 6                                                     | Farmer                                                                | -                                                                                | -                                        | FS, PK/ FS,<br>HK                                              | -                                                                                         |
| 11             | 20               | Chamois<br>Colored | Hornless           | +                 | +                                                           | +                         | +                   | +                                            | 4-5                                                    | 6                                                     | Farmer                                                                | +                                                                                | -                                        | FS, PK                                                         | -                                                                                         |
| 12             | 24               | Appenz<br>eller    | Hornless           | +                 | +                                                           | -                         | +                   | +                                            | 4                                                      | 6-9                                                   | Farmer                                                                | -                                                                                | -                                        | FS                                                             | -                                                                                         |
| 13             | 25               | Appenz<br>eller    | Hornless           | +                 | +                                                           | +                         | +                   | +                                            | NA                                                     | 6                                                     | Farmer                                                                | -                                                                                | -                                        | PS                                                             | -                                                                                         |
| 14             | 80               | Toggenb<br>urger   | Mixed              | +                 | +                                                           | +                         | +                   | +                                            | 2                                                      | 6                                                     | Farmer                                                                | -                                                                                | -                                        | HK                                                             | -                                                                                         |
| 15             | 85               | Mixed              | Mixed              | +                 | +                                                           | +                         | +                   | +                                            | 2                                                      | 6                                                     | Farmer                                                                | -                                                                                | -                                        | FS, HK/ FS                                                     | +/-                                                                                       |
| 16             | 75               | Mixed              | Hornless           | -                 | +                                                           | +                         | +                   | -                                            | 3                                                      | 5-6                                                   | Farmer                                                                | -                                                                                | -                                        | FS, AG/ FS,<br>HK                                              | -/+                                                                                       |
| 17             | 280              | Mixed              | Mixed              | +                 | -                                                           | +                         | -                   | -                                            | 3                                                      | 5-6                                                   | Farmer                                                                | -                                                                                | -                                        | FS                                                             | +/-                                                                                       |

|      |      |        |          |   |   |   |   |   |     |       |                 |     |   |                    |                 |
|------|------|--------|----------|---|---|---|---|---|-----|-------|-----------------|-----|---|--------------------|-----------------|
| 18   | 60   | Mixed  | Hornless | + | + | + | + | - | NA  | 12    | Farmer/Employee | +/- | - | PS, HK             | +/-             |
| 19   | 20   | Mixed  | Horned   | + | + | + | + | + | 3-4 | 9-12  | Farmer          | -   | - | HK/ FS, HK         | -               |
| 20   | 64   | Mixed  | Hornless | + | + | + | + | - | 2   | 20    | Farmer          | +   | - | PS, HK/ PS, HK, FS | -               |
| 21   | 20   | Mixed  | Hornless | + | + | + | + | - | 2   | 20    | Farmer          | -   | - | PS, HK, FS/ GS     | -/+             |
| 22   | 49   | Mixed  | Horned   | + | + | + | + | + | 1   | 12    | Farmer          | -   | - | FS, HK             |                 |
| 23   | 50   | Mixed  | Horned   | + | + | + | + | + | 2-3 | 8-9   | Farmer          | +   | - | FS, HK             | (spray at hand) |
| 24   | 100  | Mixed  | Mixed    | + | + | + | + | - | 2-3 | NA    | Hired staff/NA  | -   | - | FS, TK/ NA         | +/NA            |
| 25   | 30   | Mixed  | Hornless | + | + | + | + | - | 2   | 6-12  | Hired staff/NA  | +   | - | FS, AG/ NA         | +/NA            |
| 26   | 60   | Saanen | Mixed    | + | + | + | + | - | 6   | 2-2.5 | Farmer          | -   | - | FS, AG/ FS, PK     | -               |
| 27   | 70   | Mixed  | Mixed    | + | + | + | + | - | 2-3 | 6-7   | Farmer          | -   | - | FS                 | -               |
| 28   | 50   | Mixed  | Mixed    | + | + | + | + | + | 2   | NA    | Farmer          | -   | - | PS                 | (spray at hand) |
| Mean | 61.9 |        |          |   |   |   |   |   | 3.1 | 7.8   |                 |     |   |                    |                 |

Table S2. Questionnaire for 28 farms. Abbreviations: (+) = yes, (-) = no, NA = no information available, FS= foot shears, PS= pruning shears, HK= hoof knife, PK= pocket knife, AG= angle grinder.
