# Supplementary material for: Influence of Housing and Management on Claw Health in Swiss Dairy Goats
Source: MDPI journal article supplement (doi:10.3390/ani11071873), 2021-06-23
Supplement: s1 [file s1]

## Additional File S4

*Table S3 Claw lesions as documented on the claw cards in autumn and spring. Claws affected and animals affected. Autumn 2445 trimmed claws and 309 animals; Spring 2062 trimmed claws and 260 animals.*

| <i>Lesion</i>                | <i>Autumn</i> |          |       |          | <i>Spring</i> |          |       |          |
|------------------------------|---------------|----------|-------|----------|---------------|----------|-------|----------|
|                              | Claws         |          | Goats |          | Claws         |          | Goats |          |
| <i>Horn separation</i>       | 1205          | (49.5 %) | 265   | (85.8 %) | 959           | (46.5 %) | 227   | (87.3 %) |
| <i>Sole Hemorrhage</i>       | 344           | (14.1 %) | 154   | (49.8 %) | 376           | (18.2 %) | 139   | (54.5 %) |
| <i>Bleeding</i>              | 228           | (09.3 %) | 112   | (36.6 %) | 161           | (07.8 %) | 95    | (36.7 %) |
| <i>Foreign body</i>          | 8             | (00.3 %) | 8     | (02.6 %) | 9             | (00.4 %) | 9     | (03.5 %) |
| <i>Granulomatous lesion</i>  | 3             | (00.1 %) | 2     | (00.7 %) | 0             | (00.0 %) | 0     | (00.0 %) |
| <i>Horn Fissure</i>          | 2             | (00.1 %) | 2     | (00.1 %) | 0             | (00.0 %) | 0     | (00.0 %) |
| <i>Interdigital phlegmon</i> | 2             | (00.1 %) | 1     | (00.3 %) | 0             | (00.0 %) | 0     | (00.0 %) |
| <i>Toe ulcer</i>             | 0             | (00.0 %) | 0     | (00.0 %) | 1             | (00.1 %) | 1     | (00.4 %) |

*Table S4 Animals affected with horn separation in autumn and spring, with number of claws affected per animal.*

| <b>Number of claws per goat with horn separation</b> | <b>Goats affected in autumn</b> | <b>Goats affected in spring</b> |
|------------------------------------------------------|---------------------------------|---------------------------------|
| <b>0</b>                                             | 43                              | 34                              |
| <b>1</b>                                             | 28                              | 23                              |
| <b>2</b>                                             | 43                              | 29                              |
| <b>3</b>                                             | 38                              | 34                              |
| <b>4</b>                                             | 31                              | 40                              |
| <b>5</b>                                             | 26                              | 36                              |
| <b>6</b>                                             | 19                              | 29                              |
| <b>7</b>                                             | 27                              | 19                              |
| <b>8</b>                                             | 53                              | 16                              |

Table S5 Animals affected with sole hemorrhage in autumn and spring, with number of claws affected per animal.

| <b>Number of claws per goat with sole hemorrhage</b> | <b>Goats affected in autumn</b> | <b>Goats affected in spring</b> |
|------------------------------------------------------|---------------------------------|---------------------------------|
| 0                                                    | 150                             | 117                             |
| 1                                                    | 90                              | 57                              |
| 2                                                    | 34                              | 39                              |
| 3                                                    | 14                              | 20                              |
| 4                                                    | 10                              | 15                              |
| 5                                                    | 2                               | 7                               |
| 6                                                    | 4                               | 1                               |

Table S6 Animals affected with bleeding due to trimming in autumn and spring, with number of claws affected per animal.

| <b>Number of claws per goat with bleeding</b> | <b>Goats affected in autumn</b> | <b>Goats affected in spring</b> |
|-----------------------------------------------|---------------------------------|---------------------------------|
| 0                                             | 196                             | 165                             |
| 1                                             | 52                              | 60                              |
| 2                                             | 26                              | 17                              |
| 3                                             | 21                              | 8                               |
| 4                                             | 7                               | 7                               |
| 5                                             | 4                               | 3                               |
| 6                                             | 6                               | 0                               |
