# Supplementary material for: Influence of Housing and Management on Claw Health in Swiss Dairy Goats
Source: MDPI journal article supplement (doi:10.3390/ani11071873), 2021-06-23
Supplement: s1 [file s1]

Farm ID: \_\_\_\_\_  
 Ear tag: \_\_\_\_\_  
 Breed: \_\_\_\_\_  
 Date: \_\_\_\_\_

lat

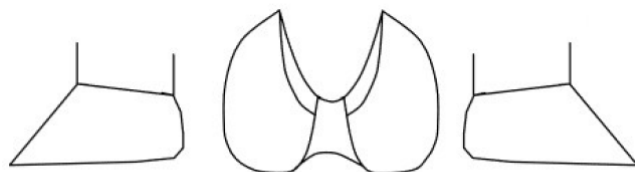

2 = severe dermatitis accompanied with necrosis

[illegible]

lat

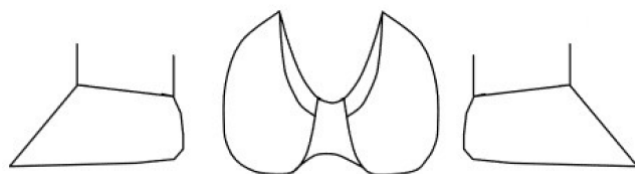

2 = severe dermatitis accompanied with necrosis

[illegible]
