# Supplementary material for: Influence of Housing and Management on Claw Health in Swiss Dairy Goats
Source: MDPI journal article supplement (doi:10.3390/ani11071873), 2021-06-23
Supplement: s1 [file s1]

**Table S1.** Housing, management and quality assessment questionnaire.

|                            |                                                                                                                |
|----------------------------|----------------------------------------------------------------------------------------------------------------|
| <b>Housing</b>             | Straw yard yes/no                                                                                              |
|                            | Additional area with hard floor yes/no                                                                         |
|                            | Access to outdoor exercise yard yes/no                                                                         |
|                            | Access to pasture in summer yes/no                                                                             |
|                            | Access to pasture at time of data collection (minimum of four weeks prior to data collection)<br>yes/no        |
|                            | Grazing on alpine pasture yes/no                                                                               |
|                            |                                                                                                                |
| <b>Management</b>          | Frequency of routine claw trimming                                                                             |
|                            | Age of goats when first trimming is conducted (in months)                                                      |
|                            | Time span since last trimming (how long ago was the last trimming in months)                                   |
|                            | Who conducts the trimming (farmer him/herself, employee or an external, trained staff)                         |
|                            | Special skills training (has the trimmer ever attended a special training for trimming small ruminants' claws) |
|                            | Usage of footbaths and in what composition                                                                     |
|                            |                                                                                                                |
| <b>Quality of trimming</b> | Cutting back wall horn ok/excessive                                                                            |
|                            | Bleeding lesions due to claw trimming                                                                          |
|                            | Equipment used for trimming                                                                                    |
|                            | Disinfection of trimming equipment yes/no                                                                      |
|                            | Disinfection of lesions yes/no                                                                                 |
